# Supplementary material for: Long read sequencing revealed proventricular virome of broiler chicken with transmission viral proventriculitis
Source: PubMed Central journal article supplement (PMC9241223; doi:10.1186/s12917-022-03339-9), 2022-06-29

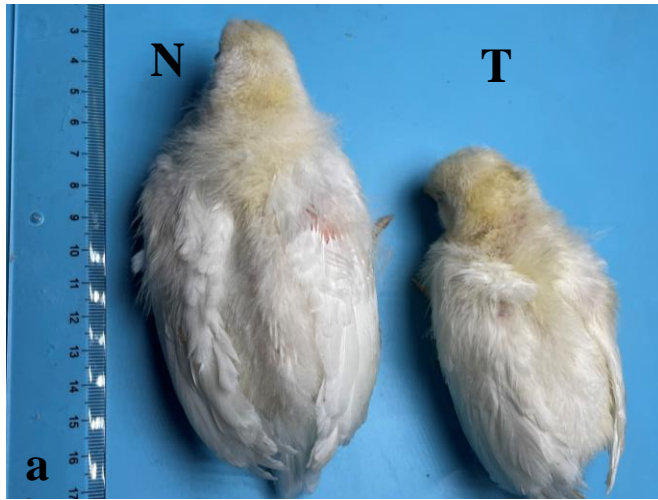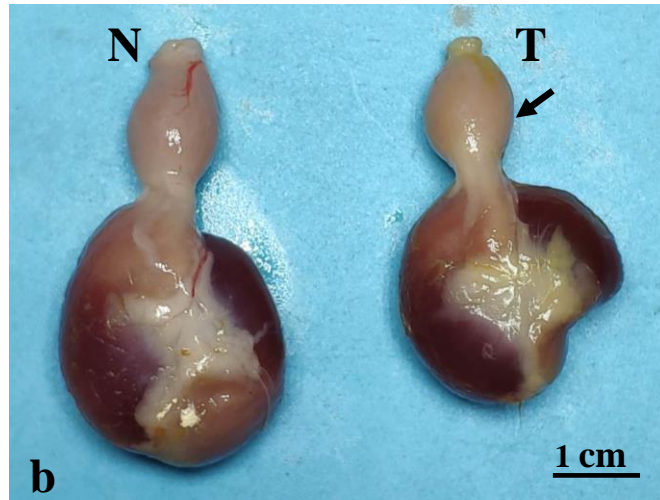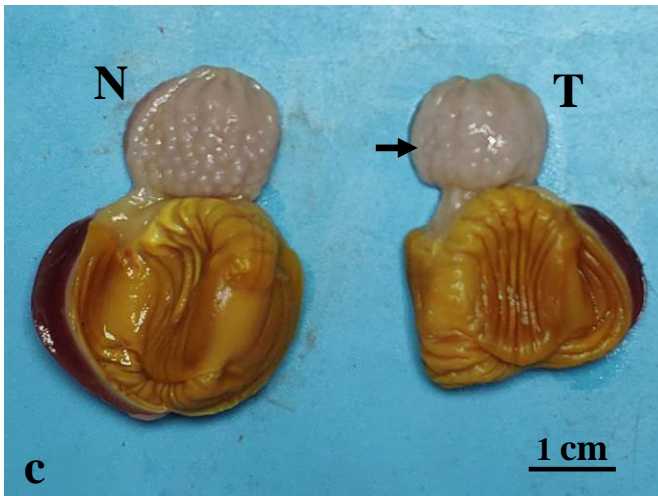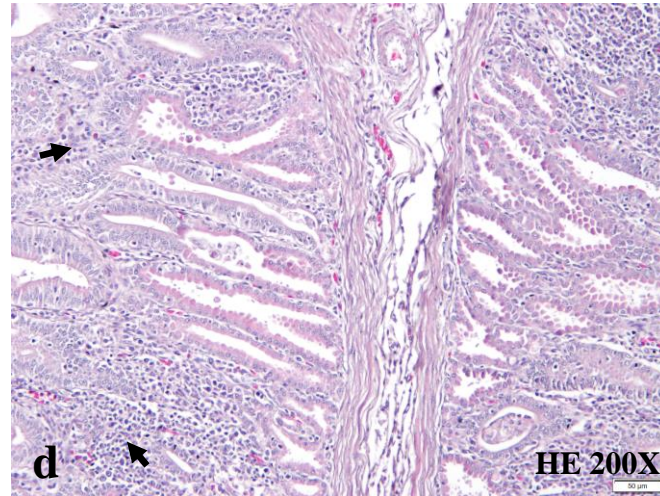

Supplement: 12917_2022_3339_MOESM1_ESM.pdf [file 12917_2022_3339_MOESM1_ESM.pdf]
